# Supplementary material for: Discovery of a pan anti-SARS-CoV-2 monoclonal antibody with highly efficient infected cell killing capacity for novel immunotherapeutic approaches
Source: PubMed Central journal article supplement — Emerg Microbes Infect. 2024 Nov 25;14(1):2432345. doi: 10.1080/22221751.2024.2432345 (PMC11632933; doi:10.1080/22221751.2024.2432345), 2024-11-25
Supplement: TEMI_A_2432345_SM8024.pdf [file TEMI_A_2432345_SM8024.pdf]

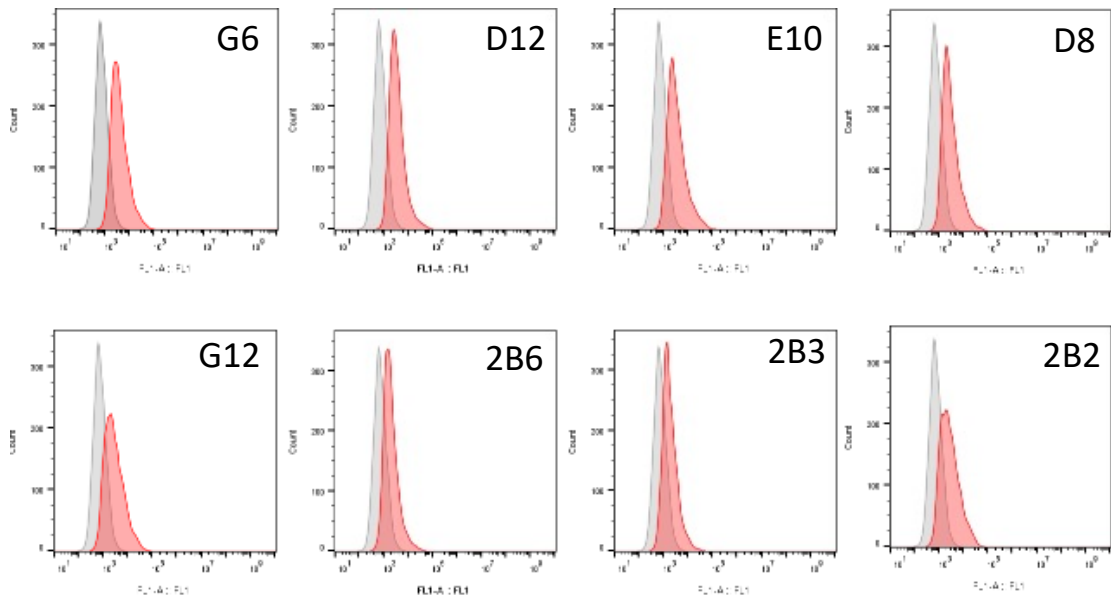

**Supplementary Figure 1.** Binding of the clones as IgGs to HEK293 cells stably expressing Wuhan Spike at the surface. Antibodies (red histogram) were used at 10  $\mu\text{g}/\text{mL}$  and detected using an AF647-coupled anti-human antibody. Grey histogram: isotype antibody control.

A

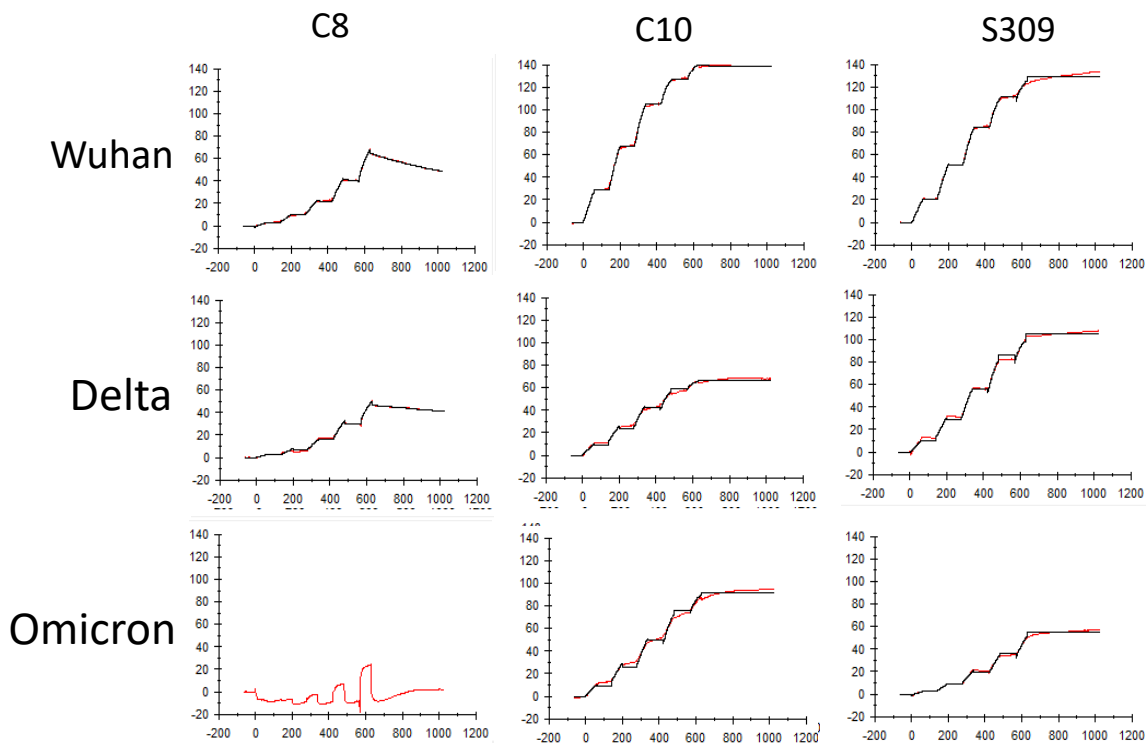

B

|                | clone | ka1 (M <sup>-1</sup> s <sup>-1</sup> ) | kd1 (s <sup>-1</sup> ) | KD1(M)          |
|----------------|-------|----------------------------------------|------------------------|-----------------|
| <b>Wuhan</b>   | C8    | 7.34+/-0.51E+04                        | 1.88+/-0.14E-03        | 2.57+/-0.26E-08 |
|                | C10   | 1.80+/-0.01E+05                        | 3.84+/-0.19E-05        | 2.13+/-0.11E-10 |
|                | S 309 | 2.08+/-0.02E+05                        | <1.00E-05*             | < 4.00E-11      |
| <b>Delta</b>   | C8    | 1.39+/-0.13E+05                        | 6.92+/-0.79E4          | 4.99+/-0.73E-09 |
|                | C10   | 1.92+/-0.01E+05                        | <1.00E-05*             | <5.20E-11       |
|                | S 309 | 1.05+/-0.01E+05                        | <1.00E-05*             | <9.50E-11       |
| <b>Omicron</b> | C8    | ND too low signal                      |                        |                 |
|                | C10   | 1.23+/-0.04E+05                        | <1.00E-05*             | <8.10E-11       |
|                | S 309 | 3.52+/-0.03E+04                        | <1.00E-05*             | <2.84E-10       |

\*kd out of the lower limit of the device

**Supplementary Figure 2.** SPR analysis of C8 and C10 binding to trimeric Spike. Ab binding to trimers of Spike variants captured using their poly-His tag (SARS-CoV-2 Spike (GCN4- IZ) His-tag from R&D system). The S309 mAb was used as control. Antibodies in increasing concentration were applied in the flow. Data were fitted to a Langmuir 1:1 model.

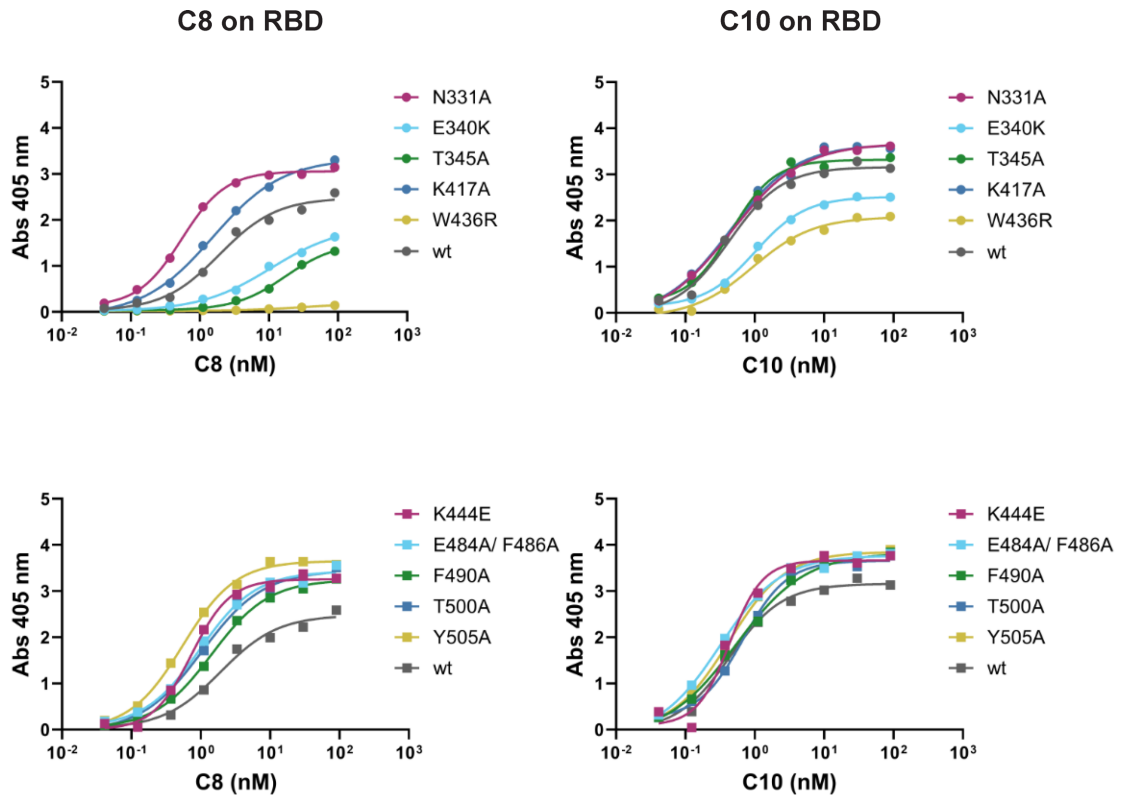

**Supplementary Figure 3.** Antibody binding of C8 and C10 mAbs on mutated SARS-CoV-2 RBD-SD1, assessed by ELISA.

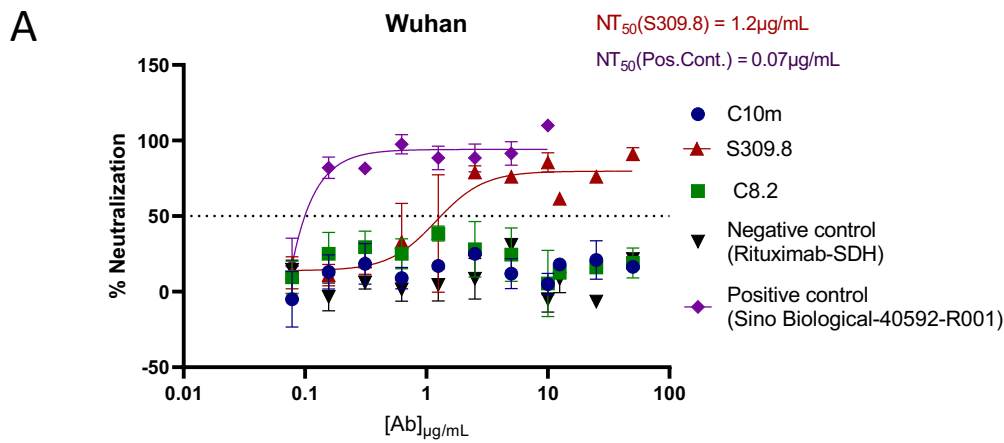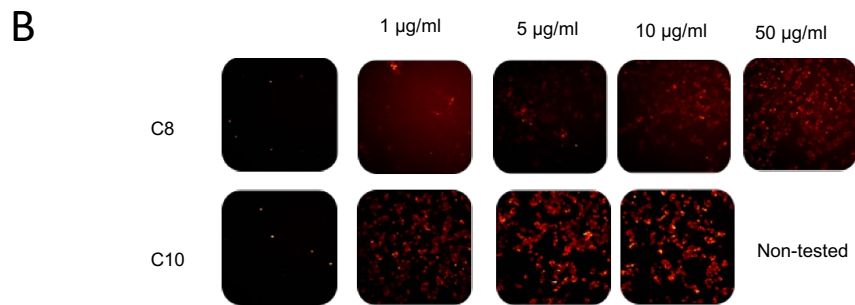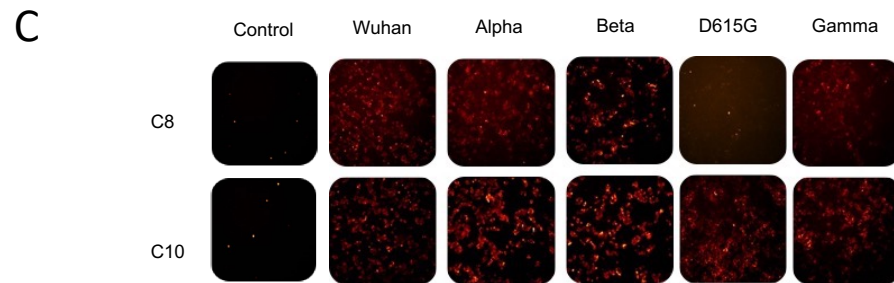

**Supplementary Figure 4. Neutralization and infected cell binding capacity of C8 and C10 mAbs.** (A) Absence of neutralization capacity of C8 and C10 mAbs. Neutralization potential of C8 and C10 against SARS-CoV-2 was assessed using a microneutralization assay against the Wuhan strain). Rituximab (anti-CD20) was used as negative control. S309.8 and 40592-R001 SARS-CoV-2 neutralizing antibodies were used as positive controls. (B) Dose response of C8 and C10 mAbs binding to Vero infected cells. Cells were incubated with primary antibodies (C8 or C10) at different concentrations (ranging from  $1\mu\text{g/mL}$  to  $50\mu\text{g/mL}$ ) with subsequent addition of a fluorescent-labeled secondary antibody. (C) Binding of C8 and C10 mAbs to Vero cells infected with different SARS-CoV-2 VOC. Vero cells were infected using the indicated VOCs at  $10^{-4}$  MOI and incubated with C8 and C10 mAbs at  $10\mu\text{g/ml}$ , with subsequent addition of a fluorescent-labeled secondary antibody. C8 and C10 mAb binding was monitored using confocal microscopy (C, D).

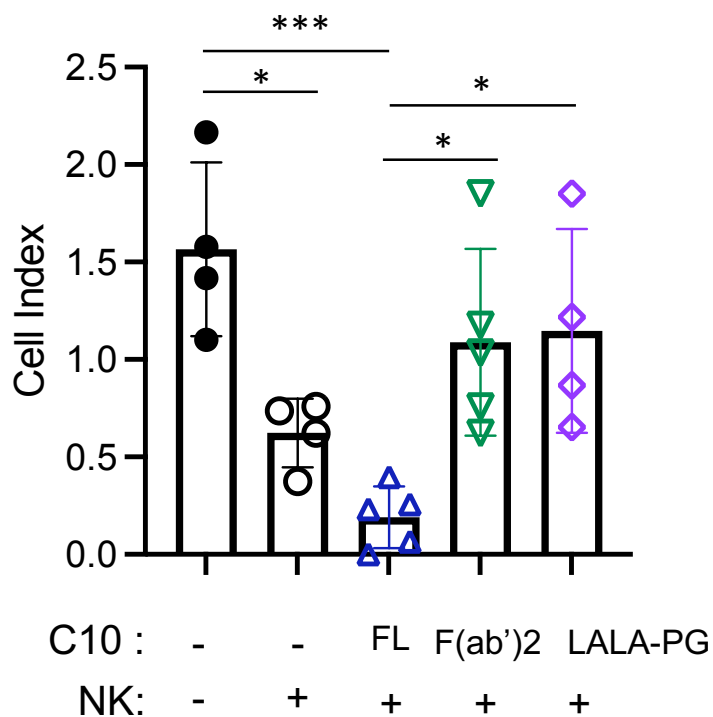

**Supplementary Figure 5.** Cytotoxic capacity against SARS-CoV-2 infected cells by different C10 mAb constructs and antibody-formats. (A) ADCC capacity of full-length (FL) C10 mAb, C10 F(ab')<sub>2</sub> fragment and C10-LALA-PG mutant, using infected lung epithelial cells as targets and primary NK cells as effector cells. Significance was assessed using one-way ANOVA with Tukey's multiple comparisons test. Values are from 2 independent experiments, with several replicates for experiment.

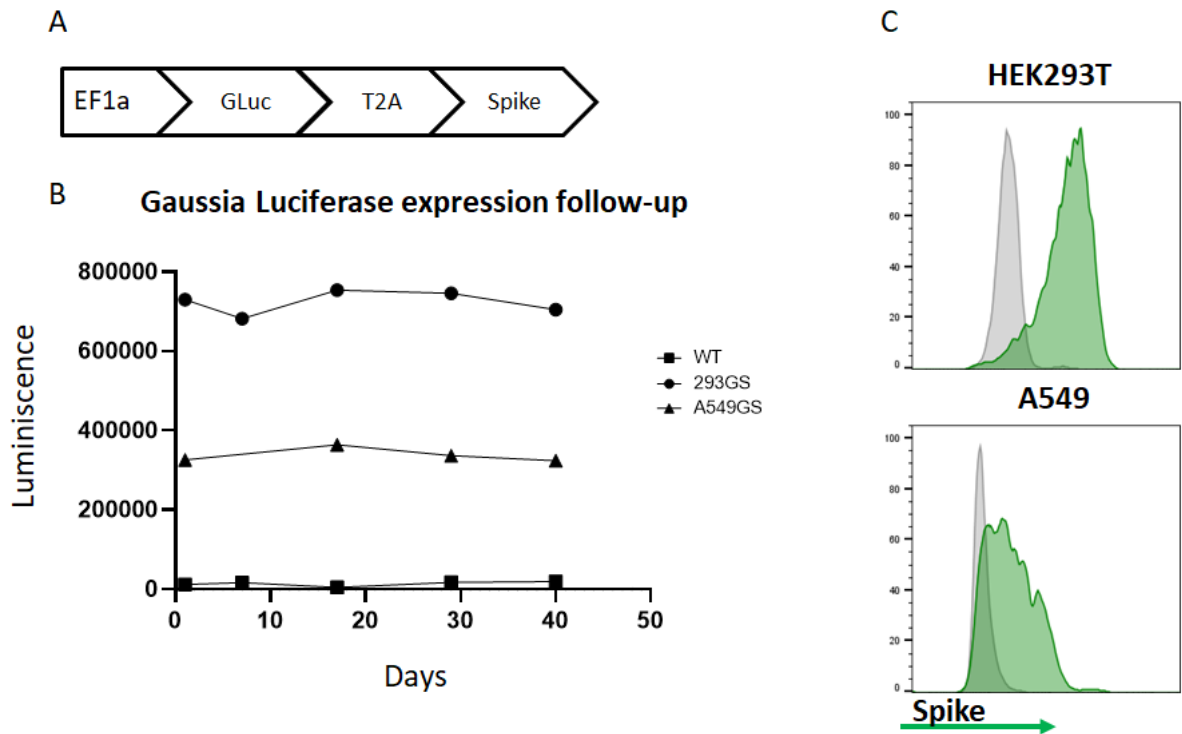

**Supplementary Figure 6. Generation of recombinant Spike-expressing cells.** (A) Design of a transgene encoding Gaussia Pierce Luciferase and SARS-CoV-2 Spike protein (GS). (B) Graphical representation of stable transgene expression in 293GS and A549GS cell lines over time assessed by luciferase expression. (C) Histogram plots showing Spike expression evaluated by flow cytometry on HEK293T and A549 cell lines transduced with the GS transgene.

A

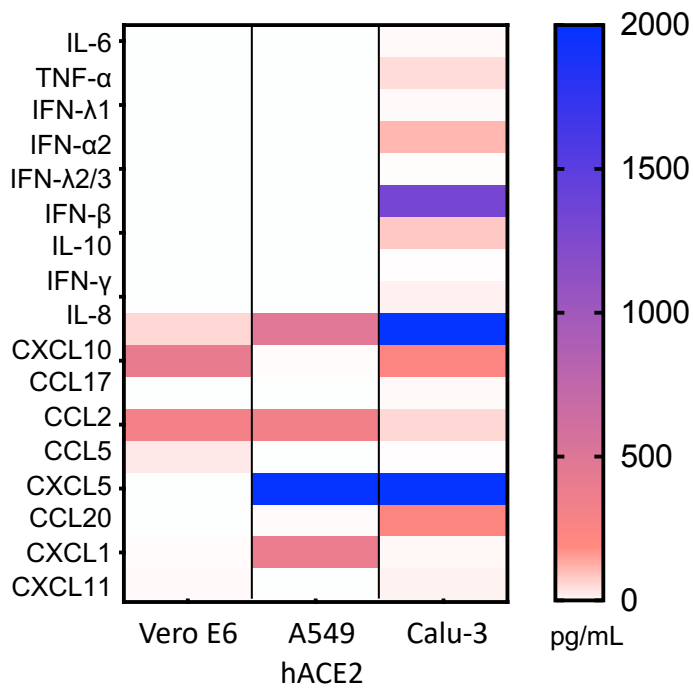

B

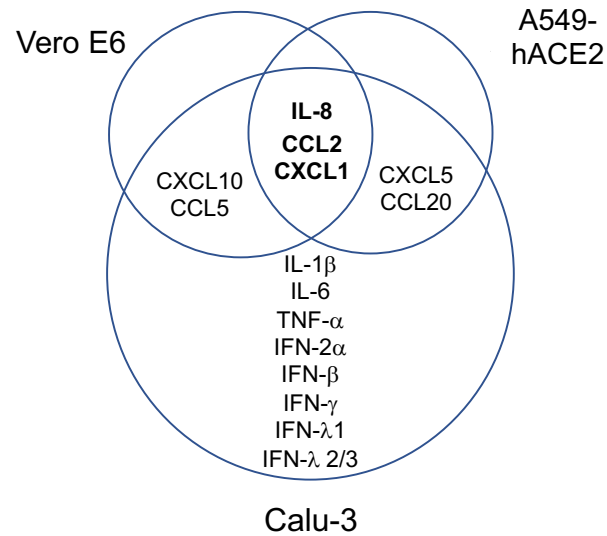

**Supplementary Figure 7. Secretome of SARS-CoV-2 infected cells.** (A) Heatmap representation of cytokines and chemokines secreted by Vero E6, A549-hACE2 and Calu-3 cells infected with SARS-CoV-2. (B) Venn diagram of secretome of the different infected cell lines.

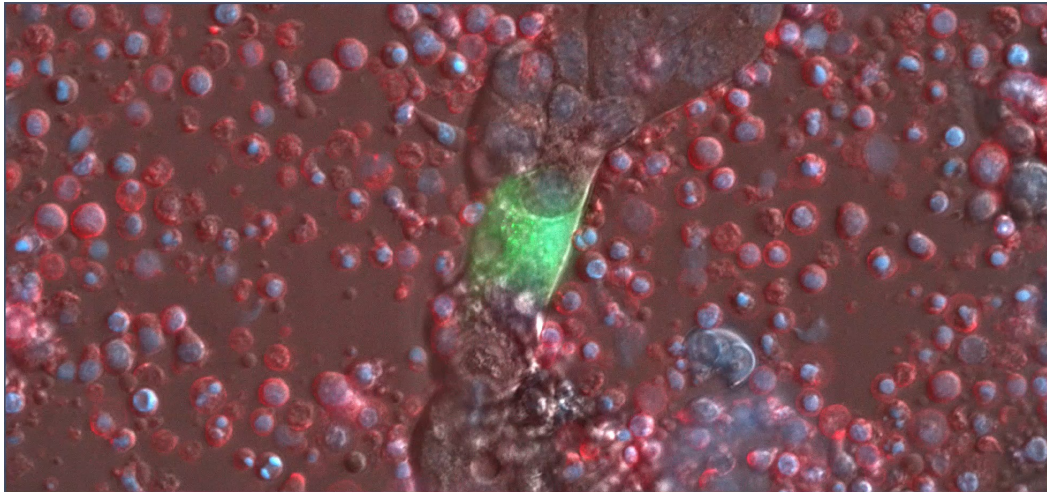

***Supplementary Video 1.*** Imaging of infected cell lysis by C10-derived CAR-T cells. Infected cells are labelled in green (through the use of NeoGreen virus) and effector cells in red and blue (through the use of an anti-CD45-APC antibody and Hoechst dye at 1:5000, respectively).



## Supplementary Tables

*Supplementary Table 1. SARS-CoV-2 strains used.*

| VOC/Mutation         | Strain                                                    | Original Source                                                | Depositor                                                 | Sequence                          |
|----------------------|-----------------------------------------------------------|----------------------------------------------------------------|-----------------------------------------------------------|-----------------------------------|
| Wuhan                | BetaCoV/France/IDF0372/2020                               | Patient hospitalized at Bichat hospital back from China, Hubei | Pr Sylvie van der WERF, Institut Pasteur, Paris, France   | EPI_ISL_410720 (GISAID ID)        |
| D614G (Indian)       | hCoV-19/France/GE1973/2020                                | Patient hospitalized at Robert Debré hospital                  | Pr Sylvie van der WERF, Institut Pasteur, Paris, France   | EPI_ISL_414631 (GISAID ID)        |
| ALPHA (UK)           | hCoV-19/France/IDF-IPP11324i/2020 (20I/501Y.V1 – B.1.1.7) | Patient hospitalized at HIA Percy, Clamart.                    | Pr Sylvie van der WERF, Institut Pasteur, Paris, France   | EPI_ISL_1138411 (Passage n° : P2) |
| BETA (South African) | hCoV-19/France/PDL-IPP01065i/2021 (20H/501Y.V2 – B.1.351) | Patient at laboratory Bioliance, Saint-Herblain                | Pr Sylvie van der WERF, Institut Pasteur, Paris, France   | EPI_ISL_1138745 (Passage n° : P2) |
| DELTA                | hCoV-19/France/HDF-IPP11602i/2021 (21A-Delta-B.1.617.2)   | Outpatient from laboratoire Alliance Anabio, Melesse.          | Dr Etienne Simon-Lorière, Institut Pasteur, Paris, France | EPI_ISL_3030060                   |
| GAMMA (Brasil)       | hCoV-19/French Guiana/IPP03772i/2021 (20J/501Y.V3 – P.1)  | Sample from Institut Pasteur, Cayenne, Guyane                  | Pr Sylvie van der WERF, Institut Pasteur, Paris, France   | EPI_ISL_2280284                   |
| Omicron              | hCoV-19/France/PDL-IPP46934i/2021 (21K - Omicron – BA.1)  | Patient hospitalized at CH de Laval                            | Pr Sylvie van der WERF, Institut Pasteur, Paris, France   | EPI_ISL_8353353                   |
| Omicron BA.2         | hCoV-19/France/PDL-IPP08031/2022, (Omicron, lineage BA.2) | Patient from Centre Hospitalier, Fontenay le Comte             | Pr Sylvie van der WERF, Institut Pasteur, Paris, France   | EPI_ISL_9879476                   |
| Omicron BA.5         | hCoV-19/France/BRE-IPP34319/2022 (22B - Omicron - BA.5.1) | Patient hospitalized at CH Simone Veil, Beauvais               | Dr Etienne Simon-Lorière, Institut Pasteur, Paris, France | EPI_ISL_13017789                  |
| Omicron XBB1.5       | hCoV-19/France/PDL-IPP58867/2022, Omicron, (XBB.1.5)      | Patient from Laval hospital                                    | Pr Sylvie van der WERF, Institut Pasteur, Paris, France   | EPI_ISL_16319988                  |

*Supplementary Table 2. Differentially expressed genes on UTD*

Fold changes of upregulated and downregulated genes by UTD cells upon Calu-3 co-culture with or without infection, provided by ROSALIND.

| GEN      | NON-INFECTED CALU-3 |            | INFECTED CALU-3 |            |
|----------|---------------------|------------|-----------------|------------|
| IFIT1    | -1,4596225          | -3,5420925 | 2,5404575       | 2,4612575  |
| IFIT3    | -1,4591900          | -3,209680  | 2,4071900       | 2,2616800  |
| ISG15    | -1,0316175          | -2,6694475 | 1,7783325       | 1,9227325  |
| USP18    | -0,7802025          | -2,1188225 | 1,6619175       | 1,2371075  |
| IFI6     | -0,972505           | -2,1466750 | 1,5253950       | 1,5937850  |
| MX1      | -0,960145           | -2,2766650 | 1,4333550       | 1,8034550  |
| IFIT2    | -2,151075           | -1,3204250 | 0,9861850       | 2,4853150  |
| IL6      | -1,4139275          | -1,5697775 | 1,7911425       | 1,1925625  |
| OAS1     | -1,1108725          | -1,6196425 | 1,1881575       | 1,5423575  |
| EGR1     | -0,7848125          | -1,8527925 | 1,1248075       | 1,5127975  |
| OASL     | -1,0395875          | -1,6746075 | 1,2174925       | 1,4967025  |
| OAS3     | -0,5414500          | -1,7261000 | 1,1360600       | 1,1314900  |
| OAS2     | -0,6856900          | -1,4095900 | 1,0945900       | 1,0006900  |
| PML      | -0,4612900          | -0,7637300 | 0,5154500       | 0,7095700  |
| ADAR     | -0,5328575          | -0,7528375 | 0,5744525       | 0,7112425  |
| IFITM3   | -0,7095550          | -0,9069350 | 0,7904450       | 0,8260450  |
| STAT2    | -0,9273475          | -0,9773975 | 0,8042725       | 1,1004725  |
| STAT1    | -0,7458500          | -0,9503500 | 0,6082500       | 1,0879500  |
| SERPINB9 | -0,2676025          | -0,6044025 | 0,6107675       | 0,2612375  |
| SMURF1   | -0,5785775          | -0,3246275 | 0,5680825       | 0,3351225  |
| SP100    | -0,3990325          | -0,4101225 | 0,2960175       | 0,5131375  |
| TRIM25   | -1,1012000          | -0,1132900 | 0,3600300       | 0,8544600  |
| TRIM22   | -0,7407725          | -0,6964825 | 0,5127075       | 0,9245475  |
| XAF1     | -0,1939250          | -1,4255850 | 0,8175550       | 0,8019550  |
| IFI35    | -0,4450900          | -1,3920500 | 1,0750300       | 0,7621100  |
| IRF7     | -0,5001875          | -1,5086575 | 1,1239925       | 0,8848525  |
| LAG3     | -0,4393550          | -1,4425250 | 1,0199850       | 0,8618950  |
| RPTOR    | 0,2634000           | 0,2324600  | -0,3009100      | -0,1949500 |
| COX7C    | 0,4145625           | 0,2490325  | -0,3132475      | -0,3503475 |

*Supplementary Table 3. Differentially expressed genes on C8-derived CAR-T cells*

| GEN     | NON-INFECTED CALU-3 |            | INFECTED CALU-3 |            |
|---------|---------------------|------------|-----------------|------------|
| OAS3    | -0,5063825          | -1,5264425 | 0,9227675       | 1,1100575  |
| PML     | -0,2586250          | -0,8067850 | 0,7180550       | 0,3473550  |
| OAS2    | -0,5155850          | -1,2447250 | 0,8176550       | 0,9426550  |
| EGR1    | -1,4611400          | -1,8006200 | 1,7592500       | 1,5025100  |
| OASL    | -1,0355075          | -1,6550875 | 1,2652625       | 1,4253325  |
| FOS     | -2,5641775          | -1,0512175 | 1,7024225       | 1,9129725  |
| IFIT2   | -1,1933700          | -1,6303700 | 1,0966900       | 1,7270500  |
| MX1     | -0,8895725          | -1,8353825 | 1,2071275       | 1,5178275  |
| USP18   | -0,5515150          | -2,1000150 | 1,4403950       | 1,2111350  |
| IFI6    | -0,6844375          | -2,3062375 | 1,4183325       | 1,5723425  |
| IFIT3   | -0,8289350          | -3,0378350 | 2,1440950       | 1,7226750  |
| ISG15   | -0,8782675          | -2,4318775 | 1,6239725       | 1,6861725  |
| CXCL6   | 0,4138875           | 1,3309975  | -0,8290325      | -0,9158525 |
| PPP3CA  | 0,6813900           | 0,3663100  | -0,7937100      | -0,2539900 |
| WDR45   | 0,1626800           | 0,7345200  | -0,7109100      | -0,1862900 |
| CXCL9   | 1,7092100           | -0,1820300 | -0,0294600      | -1,4977200 |
| SMAD5   | 0,3372675           | -0,0602825 | 0,1484775       | -0,4254625 |
| MID1IP1 | 0,3644975           | 0,1249775  | -0,1741025      | -0,3153725 |
| TSC2    | 0,0525125           | 0,4710625  | -0,2676575      | -0,2559175 |
| DVL2    | 0,3065800           | 0,1722000  | -0,1382400      | -0,3405400 |

*Supplementary Table 4.* Differentially expressed genes on C10-CD28 CAR-T cells  
Up-regulated

| GEN       | NON-INFECTED CALU-3 |            | INFECTED CALU-3 |            |
|-----------|---------------------|------------|-----------------|------------|
| NR3C1     | -1,1953825          | -0,7088125 | 1,1790475       | 0,7251475  |
| NFAT5     | -1,1306625          | -0,4517325 | 1,3121175       | 0,2702775  |
| TNFRSF10B | -0,8970600          | -0,7782600 | 1,2746800       | 0,4006400  |
| TICAM1    | -0,7431300          | -0,5306700 | 1,0690700       | 0,2047300  |
| AHR       | -0,7618050          | -0,7860050 | 1,1302350       | 0,4175750  |
| SERPINB9  | -0,3981150          | -0,6273950 | 0,5681250       | 0,4573850  |
| PIK3R1    | -0,3367825          | -0,7770125 | 0,5184575       | 0,5953375  |
| FNIP1     | -0,3626825          | -0,4428425 | 0,8852875       | -0,0797625 |
| JAK1      | -0,2338000          | -0,5489400 | 0,6285900       | 0,1541500  |
| STAM      | -0,3971725          | -0,2225725 | 0,3689275       | 0,2508175  |
| TET2      | -0,4740800          | -0,3739900 | 0,6178300       | 0,2302400  |
| TRAF3     | -0,4052000          | -0,2493200 | 0,4034100       | 0,2511100  |
| IL2       | -0,8165975          | -1,3589675 | 3,0810925       | -0,9055275 |
| TNF       | -1,0809825          | -1,3636325 | 1,9423475       | 0,5022675  |
| CXCL1     | -1,1005575          | -1,4236475 | 1,6306025       | 0,8936025  |
| BCL6      | -0,8108425          | -1,7435725 | 1,2398275       | 1,3145875  |
| OASL      | -1,2655225          | -1,7297025 | 1,3905375       | 1,6046875  |
| GADD45B   | -0,7720025          | -2,2962325 | 2,1766875       | 0,8915475  |
| IFNGR2    | -1,3536450          | -1,6550850 | 2,1448950       | 0,8638350  |
| FOS       | -2,7706125          | -1,5086325 | 2,1188675       | 2,1603775  |
| DUSP1     | -2,1184025          | -2,0123625 | 2,2049175       | 1,9258475  |
| IL6       | -2,5890550          | -1,9228750 | 2,8390650       | 1,6728650  |
| IFNB1     | -3,0999425          | -3,9723725 | 3,0840075       | 3,9883075  |
| JUN       | -1,7904150          | -2,3372350 | 2,4446250       | 1,6830250  |
| EGR1      | -1,6304300          | -2,9207100 | 2,6540400       | 1,8971000  |
| CCL20     | -2,1050775          | -1,3063875 | 2,7056125       | 0,7058525  |
| CXCL8     | -2,0055550          | -1,7839350 | 2,8882950       | 0,9011950  |
| CXCL2     | -1,7931525          | -1,3595025 | 1,7908775       | 1,3617775  |
| CXCL3     | -1,6751675          | -1,4818975 | 2,0736825       | 1,0833825  |
| NFKBIA    | -2,0321700          | -1,3550100 | 2,1069900       | 1,2801900  |

*Supplementary Table 5. Differentially expressed genes on C10-CD28 CAR-T*  
Down-regulated

| GEN      | NON-INFECTED CALU-3 |            | INFECTED CALU-3 |            |
|----------|---------------------|------------|-----------------|------------|
| COX16    | 0,3036400           | 0,3334300  | -0,3087700      | -0,3283000 |
| NCAPG2   | 0,3281450           | 0,3517550  | -0,4167150      | -0,2631850 |
| UQCR10   | 0,5226800           | 0,1403900  | -0,3231800      | -0,3398900 |
| TP53     | 0,4943550           | 0,1190650  | -0,2887450      | -0,3246750 |
| MAP2K2   | 0,2588050           | 0,0543950  | -0,1618550      | -0,1513450 |
| RAC2     | 0,2953500           | 0,2212900  | -0,2694600      | -0,2471800 |
| AKT1     | 0,3800000           | 0,1508800  | -0,3475900      | -0,1832900 |
| ITGB2    | 0,3520500           | 0,1962000  | -0,3748800      | -0,1733700 |
| OAT      | 0,4711875           | 0,0440075  | -0,3476825      | -0,1675125 |
| COX6B1   | 0,4166875           | 0,1668675  | -0,3312525      | -0,2523025 |
| ACSL5    | 0,3268625           | 0,4315725  | -0,1942075      | -0,5642275 |
| PKD1     | 0,5358250           | 0,1858450  | -0,1960950      | -0,5255750 |
| PSMB10   | 0,4334050           | 0,1436950  | -0,1628150      | -0,4142850 |
| TRBV2    | 0,6094775           | -0,2226525 | -0,0598025      | -0,3270225 |
| TRAV22   | 0,5169250           | -0,2738850 | 0,1918850       | -0,4349250 |
| RPTOR    | 0,3448625           | -0,1034875 | 0,1606525       | -0,4020275 |
| LPAR6    | 0,7498725           | -0,1131575 | -0,3676175      | -0,2690975 |
| NDUFB9   | 0,5069725           | 0,0787225  | -0,2663475      | -0,3193475 |
| SLC2A1   | 0,7051925           | -0,0422575 | 0,0413025       | -0,7042375 |
| TRBV29-1 | 1,1443025           | -0,1900075 | 0,0469025       | -1,0011975 |
| CTSW     | 0,8795425           | -0,3984375 | 0,0407825       | -0,5218875 |
| LAMP2    | 1,0184475           | -0,1870925 | -0,1968325      | -0,6345225 |
| CTSD     | 1,5393775           | 0,0428875  | -0,4865225      | -1,0957425 |
| MIF      | 0,6278700           | 0,2601600  | -0,4567300      | -0,4313000 |
| SCD      | 0,7153650           | 0,1884850  | -0,4821950      | -0,4216550 |
| CD9      | 0,8452825           | 0,3462725  | -0,9728675      | -0,2186875 |
| DHRS4    | 0,4600050           | 0,3906850  | -0,7067750      | -0,1439150 |
| 1.00 PGK | 0,5040850           | 0,4037850  | -0,7158550      | -0,1920150 |
| ALDOC    | 0,4525600           | 0,6620800  | -0,6054600      | -0,5091800 |
| PKM      | 0,4290175           | 0,4213375  | -0,5781025      | -0,2722525 |
| TKT      | 0,5486700           | 0,1824900  | -0,6245500      | -0,1066100 |
| NME2     | 0,4516500           | 0,2799500  | -0,5310500      | -0,2005500 |
| MTHFD1   | 0,2700550           | 0,3264950  | -0,5151750      | -0,0813750 |
| COX5B    | 0,3765275           | 0,2631175  | -0,5566325      | -0,0830125 |
| MAGED1   | 0,3369600           | 0,3124200  | -0,5433500      | -0,1060300 |
| PPIA     | 0,3350500           | 0,3391500  | -0,5429500      | -0,1312500 |
| PHGDH    | 0,3497900           | 0,4996800  | -0,9621100      | 0,1126400  |
| GNAI2    | 0,2077000           | 0,4059000  | -0,6404000      | 0,0268000  |
| NDUFA2   | 0,2163625           | 0,5982125  | -0,6451875      | -0,1693875 |
| PFKL     | 0,2470400           | 0,5040900  | -0,6914800      | -0,0596500 |
| WHSC1    | 0,1683250           | 0,3965750  | -0,5503950      | -0,0145050 |
| UQCRQ    | 0,2289975           | 0,3897875  | -0,5812525      | -0,0375325 |

*Supplementary Table 6.* Differentially expressed genes on C10-BBz CAR-T cells  
Up-regulated

| GEN       | NON-INFECTED CALU-3 |            | INFECTED CALU-3 |            |
|-----------|---------------------|------------|-----------------|------------|
| EGR1      | -0,9698225          | -2,5689325 | 1,5103275       | 2,0284275  |
| GADD45B   | -1,0324925          | -2,0727025 | 1,3656075       | 1,7395875  |
| OASL      | -1,3173200          | -1,7027200 | 1,3819500       | 1,6380900  |
| CXCL1     | -1,4802825          | -1,2851725 | 1,5184275       | 1,2470275  |
| NFKBIA    | -2,1773850          | -0,9731050 | 1,3843950       | 1,7660950  |
| CXCL3     | -1,8306125          | -1,2056025 | 1,4191575       | 1,6170575  |
| CXCL2     | -1,8154400          | -1,1576800 | 1,1763600       | 1,7967600  |
| JUNB      | -1,5073200          | -0,4174000 | 1,3937900       | 0,5309300  |
| MX1       | -1,4795475          | -0,9609975 | 1,3158225       | 1,1247225  |
| OAS1      | -1,0049475          | -1,2801975 | 1,6229325       | 0,6622125  |
| IFI6      | -1,5197250          | -1,0770150 | 1,8493950       | 0,7473450  |
| IFNGR2    | -1,3301150          | -1,5355550 | 1,8176850       | 1,0478850  |
| IL6       | -2,0208850          | -1,5299250 | 1,3924350       | 2,1583750  |
| DUSP1     | -2,1455900          | -1,6142500 | 1,6560300       | 2,1038100  |
| JUN       | -1,8069800          | -2,2040400 | 2,1129600       | 1,8980600  |
| CXCL8     | -2,3400350          | -1,4416350 | 2,3100350       | 1,4716350  |
| IFIT3     | -1,3661975          | -1,9747675 | 2,4989925       | 0,8419725  |
| USP18     | -1,0602650          | -1,6437450 | 1,7260250       | 0,9779850  |
| ISG15     | -1,2646825          | -1,8039125 | 2,1071475       | 0,9614475  |
| IFIT1     | -1,3729250          | -2,6917650 | 3,0681650       | 0,9965250  |
| LAG3      | -0,6782250          | -0,8173050 | 0,7274250       | 0,7681050  |
| PTGER4    | -0,3575550          | -0,9148450 | 0,4831850       | 0,7892150  |
| NR3C1     | -0,6405525          | -0,7714225 | 0,4556275       | 0,9563475  |
| IL4R      | -0,1833500          | -0,3805400 | 0,3009100       | 0,2629800  |
| RELA      | -0,2687250          | -0,2601550 | 0,4792550       | 0,0496250  |
| DIABLO    | -0,3339125          | -0,3200425 | 0,4386575       | 0,2152975  |
| FOXO1     | -0,4011775          | -0,4688375 | 0,4553325       | 0,4146825  |
| USP15     | -0,2469650          | -0,4647650 | 0,4610150       | 0,2507150  |
| MTOR      | -0,2634200          | -0,4993300 | 0,1399200       | 0,6228300  |
| TRAF6     | -0,1720900          | -0,5367400 | 0,0353200       | 0,6735100  |
| IRF7      | -0,0960900          | -1,4607400 | 1,1817100       | 0,3751200  |
| CTNND1    | -0,1047750          | -1,5167250 | 1,1147550       | 0,5067450  |
| BCL6      | -0,4854550          | -1,6415050 | 0,9111950       | 1,2157650  |
| IRF1      | -0,4962300          | -1,4327800 | 1,3545700       | 0,5744400  |
| TICAM1    | -0,3986975          | -0,5674175 | 0,7416025       | 0,2245125  |
| SERPINB9  | -0,3240325          | -0,5987825 | 0,8162775       | 0,1065375  |
| CD69      | -0,7805275          | -0,4733275 | 0,8941125       | 0,3597425  |
| SLC3A2    | -0,6743200          | -0,5660100 | 0,8983000       | 0,3420300  |
| MAP3K14   | -0,0963175          | -0,9665975 | 1,0595825       | 0,0033325  |
| TNFRSF10B | -0,5101750          | -0,8955750 | 1,0126050       | 0,3931450  |
| SRC       | -0,0697475          | -1,1522475 | 0,8529625       | 0,3690325  |
| PIK3R1    | -0,3453675          | -0,9281075 | 0,7949325       | 0,4785425  |
| IL6ST     | -0,3780750          | -1,0371650 | 1,5129950       | -0,0977550 |

*Supplementary Table 7. Differentially expressed genes on C10-BBz CAR-T*  
Down-regulated

| GEN      | NON-INFECTED CALU-3 |            | INFECTED CALU-3 |            |
|----------|---------------------|------------|-----------------|------------|
| ATP5J2   | 0,5925925           | 0,8985425  | -1,8031575      | 0,3120225  |
| SMC2     | 0,5350625           | 0,6678225  | -1,2091575      | 0,0062725  |
| PTPRC    | 0,6238400           | 0,7336400  | -1,1705800      | -0,1869000 |
| CASP3    | 0,1606125           | 0,5993525  | -0,8932475      | 0,1332825  |
| NCAPH    | 0,2883700           | 0,8297800  | -0,9656000      | -0,1525500 |
| DOCK2    | 0,2139750           | 0,5909650  | -0,7444950      | -0,0604450 |
| PYCR2    | 0,3192325           | 0,5586625  | -0,7048575      | -0,1730375 |
| COX7B    | 0,2718475           | 0,4610875  | -0,6377725      | -0,0951625 |
| GLUD1/2  | 0,3788050           | 0,4515950  | -0,7748750      | -0,0555250 |
| UBE2F    | 0,2557325           | 0,4802325  | -0,7352075      | -0,0007575 |
| NDUFA1   | 0,3348100           | 0,4199300  | -0,6878900      | -0,0668500 |
| JAK2     | 0,9213225           | 0,4601025  | -1,1993375      | -0,1820875 |
| IL10RA   | 0,8253075           | 0,3713975  | -0,8538125      | -0,3428925 |
| CCL28    | 0,7790650           | 0,0327950  | -0,7051250      | -0,1067350 |
| IFNAR1   | 0,6732625           | 0,3866225  | -0,7713975      | -0,2884875 |
| MTHFS    | 0,5411925           | 0,3413225  | -0,6139575      | -0,2685575 |
| CD3G     | 0,5029775           | 0,2624775  | -0,5110425      | -0,2544125 |
| GZMA     | 0,4257825           | 0,5937725  | -0,4572775      | -0,5622775 |
| VAV1     | 0,2604025           | 0,5056625  | -0,5341975      | -0,2318675 |
| SHMT1    | 0,3210000           | 0,5089000  | -0,5761700      | -0,2537300 |
| LCK      | 0,3787075           | 0,4897975  | -0,5983425      | -0,2701625 |
| CDC26    | 0,0894725           | 0,6550925  | -0,3390675      | -0,4054975 |
| TFDP1    | 0,1328500           | 0,4729100  | -0,3163000      | -0,2894600 |
| ACSL5    | 0,1083825           | 0,5189725  | -0,4725975      | -0,1547575 |
| SH2D1A   | 0,2385850           | 0,4138150  | -0,5141950      | -0,1382050 |
| SLC25A6  | 0,2999650           | 0,3525550  | -0,4660750      | -0,1864450 |
| WAS      | 0,3402100           | 0,2211100  | -0,4351000      | -0,1262200 |
| ATP5L    | 0,2736325           | 0,3425825  | -0,3515975      | -0,2646175 |
| COX5B    | 0,3637650           | 0,2534950  | -0,2649250      | -0,3523350 |
| SMAD2    | 0,2473525           | 0,3591525  | -0,3458275      | -0,2606775 |
| PARP1    | 0,2448025           | 0,3176925  | -0,3012275      | -0,2612675 |
| NOTCH1   | 0,8026650           | 0,5129850  | -0,6419950      | -0,6736550 |
| TRAV17   | 0,8078425           | 0,4898125  | -0,3630575      | -0,9345975 |
| TRBV3-1  | 1,2299625           | 0,0859225  | -0,4528575      | -0,8630275 |
| IL16     | 1,0432525           | 0,3396125  | -0,4979175      | -0,8849475 |
| TRBV13   | 1,1026125           | -0,0534375 | 0,3949225       | -1,4440975 |
| TRBV10-3 | 1,2369375           | -0,0934925 | 0,0553075       | -1,1987525 |
| TRBV6-9  | 0,8467025           | 0,2045225  | 0,1569325       | -1,2081575 |
| CD7      | 0,7456225           | 0,2569925  | 0,3009725       | -1,3035875 |
| LAMP1    | 0,4643800           | 0,2773800  | 0,1217400       | -0,8635000 |
| DHRS4    | 0,6265050           | 0,3009350  | -0,2051750      | -0,7222650 |
| TRBC1/2  | 0,9053850           | 0,1079250  | -0,3022350      | -0,7110750 |
| RDH14    | 0,4782675           | 0,0647175  | -0,0595025      | -0,4834825 |
| TRIM33   | 0,4211025           | 0,0282625  | -0,1833375      | -0,2660275 |
| TRBV4-2  | 0,7193775           | 0,1080975  | -0,3627125      | -0,4647625 |
| LAT      | 0,7130750           | 0,1429150  | -0,4267350      | -0,4292550 |
| ITGB2    | 0,4991625           | 0,1260125  | -0,3605275      | -0,2646475 |
| MAP2K7   | 0,6621250           | 0,0396850  | -0,3350750      | -0,3667350 |
| TSC2     | 0,6147875           | 0,0657275  | -0,3741925      | -0,3063225 |
| TRBV12-3 | 1,1865950           | -0,3687350 | -0,6503850      | -0,1674750 |
| TRBV9    | 1,0548025           | -0,1193175 | -0,4329275      | -0,5025575 |
| TRAV36   | 0,9140675           | -0,3130725 | 0,0543675       | -0,6553625 |
| TRBV15   | 0,6843100           | -0,0302800 | -0,0684700      | -0,5855600 |
| CALM1    | 0,6424600           | -0,0887000 | -0,0183300      | -0,5354300 |
| TRDV1    | 0,8599875           | -0,1850425 | -0,3216425      | -0,3533025 |
| TRAV26-1 | 0,7941500           | -0,0761300 | -0,4191800      | -0,2988400 |
| TRAT1    | 0,8550125           | 0,0251825  | -0,4078075      | -0,4723875 |
| IL32     | 0,8465000           | 0,1008000  | -0,4774000      | -0,4699000 |
